# Supplementary material for: Effects of Selected Arbuscular Mycorrhizal Fungi, Rock Phosphate, and Compost on Growth and Nutrient Uptake of Citrus Seedlings
Source: Research Square preprint supplement (doi:10.21203/rs.3.rs-8019594/v1), 2025-11-18
Supplement: Supplementary file 1 [file 216d458c9d114004d354141d.docx]

Table 1. Menzilat soil physical, chemical and biological properties.

| Sand | Silt | Clay | CaCO3 | Org.  Matter | CEC | pH | Olsen-P | Zn | Fe | Cu | Mn |
| --- | --- | --- | --- | --- | --- | --- | --- | --- | --- | --- | --- |
| (%) | | | | | (Cmolkg-1) | kg/da | |  | mg kg-1 | | |
| 31,6 | 36,5 | 32,0 | 34 | 1,65 | 30,4 | 7.98 | 8,76 | 0.36 | 1,38 024 2.74 | | |

Compost's physical, chemical and biological properties

| pH | Organic | Total | | Olsen-P | | K | Ca | Mg | | Zn | Fe | Cu | Mn | |
| --- | --- | --- | --- | --- | --- | --- | --- | --- | --- | --- | --- | --- | --- | --- |
| (1:1) | matter | N | P |  | |  |  |  | |  | |  | | |
|  | (%) | | | mg kg-1 | (%) | | | | mg kg-1 | | | | |
| 7.91 | 54.2 | 1.13 | 0.18 | 107.1 | | 0.98 | 2.50 | 0.27 | | 40 | 1005 | 12 | 141 | |

Rock phosphate has physical, chemical, and biological properties.

| Total P | Available P | K | Ca | Mg |
| --- | --- | --- | --- | --- |
| (%) | mg kg-1 | (%) | (%) | (%) |
| 13.8 | 31.3 | 0.50 | 18.5 | 1.27 |

Table 2. Effects of Rock Phosphate, compost doses and mycorrhizae special inoculation on citrus shoot and root dry weight

| **Rock_P** | **AMF** | **Shoot dry wt.** | | |  | **Root dry wt.** | | |
| --- | --- | --- | --- | --- | --- | --- | --- | --- |
| **C0** | **C20** | **C40** |  | **C0** | **C20** | **C40** |
| R0 | M1 | 0.16 ± 0.03 | 0.31 ± 0.09 | 0.28 ± 0.02 |  | 0.16 ± 0.02 | 0.31 ± 0.02 | 0.23 ± 0.07 |
| R0 | M2 | 2.18 ± 0.26 | 1.78 ± 1.14 | 3.02 ± 0.71 |  | 1.18 ± 0.12 | 1.84 ± 0.01 | 1.16 ± 0.02 |
| R0 | M3 | 1.38 ± 0.47 | 1.61 ± 0.73 | 0.49 ± 0.17 |  | 0.30 ± 0.11 | 0.63 ± 0.13 | 0.17 ± 0.05 |
| R0 | M4 | 0.45 ± 0.12 | 1.53 ± 0.07 | 2.58 ± 0.99 |  | 0.40 ± 0.08 | 0.22 ± 0.08 | 0.84 ± 0.46 |
| R0 | M5 | 0.45 ± 0.24 | 2.31 ± 2.08 | 0.59 ± 0.67 |  | 0.25 ± 0.14 | 0.60 ± 0.42 | 0.32 ± 0.22 |
| R0 | M6 | 0.34 ± 0.07 | 0.54 ± 0.11 | 0.62 ± 0.10 |  | 0.17 ± 0.04 | 0.23 ± 0.08 | 0.28 ± 0.03 |
| R0 | M7 | 2.94 ± 0.89 | 1.77 ± 0.59 | 2.18 ± 0.85 |  | 1.46 ± 0.08 | 0.68 ± 0.10 | 1.26 ± 0.76 |
| R2 | M1 | 0.23 ± 0.02 | 0.33 ± 0.10 | 0.32 ± 0.08 |  | 0.16 ± 0.04 | 0.39 ± 0.05 | 0.25 ± 0.04 |
| R2 | M2 | 3.34 ± 0.52 | 2.74 ± 0.79 | 3.48 ± 0.10 |  | 1.30 ± 0.31 | 1.20 ± 0.17 | 0.99 ± 0.22 |
| R2 | M3 | 2.14 ± 0.78 | 0.98 ± 0.01 | 3.48 ± 0.16 |  | 1.04 ± 0.64 | 0.78 ± 0.19 | 1.08 ± 0.14 |
| R2 | M4 | 1.63 ± 0.20 | 1.57 ± 0.08 | 3.26 ± 0.91 |  | 0.42 ± 0.17 | 0.19 ± 0.02 | 1.00 ± 0.68 |
| R2 | M5 | 3.54 ± 1.35 | 1.57 ± 0.09 | 2.09 ± 0.63 |  | 1.16 ± 0.49 | 0.47 ± 0.05 | 1.04 ± 0.22 |
| R2 | M6 | 0.50 ± 0.04 | 0.71 ± 0.02 | 0.65 ± 0.09 |  | 0.29 ± 0.00 | 0.56 ± 0.05 | 0.48 ± 0.10 |
| R2 | M7 | 2.53 ± 0.67 | 2.68 ± 1.26 | 1.55 ± 1.47 |  | 1.43 ± 0.12 | 0.98 ± 0.42 | 1.53 ± 0.75 |
| R4 | M1 | 0.19 ± 0.08 | 0.28 ± 0.03 | 0.21 ± 0.01 |  | 0.19 ± 0.01 | 0.26 ± 0.01 | 0.16 ± 0.03 |
| R4 | M2 | 2.64 ± 0.34 | 5.24 ± 0.99 | 2.06 ± 0.23 |  | 1.23 ± 0.26 | 2.30 ± 0.46 | 0.70 ± 0.20 |
| R4 | M3 | 2.30 ± 0.29 | 1.61 ± 0.58 | 2.57 ± 1.07 |  | 0.56 ± 0.17 | 0.55 ± 0.21 | 0.85 ± 0.10 |
| R4 | M4 | 2.32 ± 1.18 | 2.08 ± 0.82 | 3.83 ± 0.61 |  | 0.80 ± 0.32 | 0.20 ± 0.02 | 0.80 ± 0.07 |
| R4 | M5 | 2.08 ± 0.32 | 2.14 ± 0.19 | 1.64 ± 1.47 |  | 0.52 ± 0.09 | 0.74 ± 0.19 | 0.90 ± 0.29 |
| R4 | M6 | 0.53 ± 0.25 | 1.06 ± 0.29 | 0.70 ± 0.01 |  | 0.29 ± 0.03 | 0.82 ± 0.33 | 0.25 ± 0.07 |
| R4 | M7 | 1.31 ± 0.71 | 2.84 ± 2.15 | 1.69 ± 0.93 |  | 0.49 ± 0.23 | 1.29 ± 0.59 | 0.74 ± 0.20 |
| **Compost Mean** | | **1.58 ± 1.19** | **1.70 ± 1.32** | **1.78 ± 1.32** |  | **0.66 ± 0.50** | **0.73 ± 0.58** | **0.72 ± 0.48** |
| AMF Mean | M1 | 0.19 ± 0.05 ᶜ | 0.31 ± 0.07 ᵈ | 0.27 ± 0.06 ᵉ |  | 0.17 ± 0.03 ᵈ | 0.32 ± 0.06 ᶜᵈ | 0.21 ± 0.06 ᵈ |
| M2 | 2.72 ± 0.61 ᵃ | 3.25 ± 1.76 ᵃ | 2.85 ± 0.73 ᵃᵇ | | 1.24 ± 0.22 ᵃ | 1.78 ± 0.54 ᵃ | 0.95 ± 0.25 ᵃᵇ |
| M3 | 1.94 ± 0.64 ᵃᵇ | 1.40 ± 0.56 ᵇᶜᵈ | 2.18 ± 1.44 ᵇᶜ |  | 0.64 ± 0.47 ᵇ | 0.65 ± 0.19 ᵇᶜ | 0.70 ± 0.42 ᵇᶜ |
| M4 | 1.47 ± 1.02 ᵇ | 1.73 ± 0.49 ᵇᶜ | 3.23 ± 0.92 ᵃ |  | 0.54 ± 0.27 ᵇᶜ | 0.20 ± 0.05 ᵈ | 0.88 ± 0.42 ᵃᵇ |
| M5 | 2.02 ± 1.51 ᵃᵇ | 2.01 ± 1.10 ᵃᵇᶜ | 1.44 ± 1.09 ᶜᵈ |  | 0.64 ± 0.48 ᵇ | 0.60 ± 0.26 ᶜ | 0.76 ± 0.40 ᵃᵇᶜ |
| M6 | 0.46 ± 0.15 ᶜ | 0.77 ± 0.28 ᶜᵈ | 0.66 ± 0.07 ᵈᵉ | | 0.25 ± 0.06 ᶜᵈ | 0.54 ± 0.31 ᶜᵈ | 0.34 ± 0.12 ᶜᵈ |
| M7 | 2.26 ± 0.99 ᵃᵇ | 2.43 ± 1.37 ᵃᵇ | 1.81 ± 1.01 ᶜ |  | 1.13 ± 0.49 ᵃ | 0.98 ± 0.45 ᵇ | 1.18 ± 0.65 ᵃ |
| Rock_P man | R0 | 1.13 ± 1.07 ᵇ | 1.41 ± 1.06 ᵇ | 1.40 ± 1.21 ᵇ |  | 0.56 ± 0.51 ᵇ | 0.64 ± 0.55 ᵇ | 0.61 ± 0.53 ᵇ |
| R2 | 1.99 ± 1.35 ᵃ | 1.51 ± 1.00 ᵇ | 2.12 ± 1.40 ᵃ |  | 0.83 ± 0.57 ᵃ | 0.65 ± 0.37 ᵇ | 0.91 ± 0.52 ᵃ |
| R4 | 1.62 ± 1.03 ᵃ | 2.18 ± 1.71 ᵃ | 1.81 ± 1.32 ᵃᵇ | | 0.58 ± 0.36 ᵇ | 0.88 ± 0.74 ᵃ | 0.63 ± 0.32 ᵇ |
| Two-way ANOVA (R*M) | Rock_P (R) | <0.001⁎⁎⁎ | 0.011⁎ | 0.008⁎⁎ |  | <0.001⁎⁎⁎ | 0.004⁎⁎ | 0.006⁎⁎ |
| AMF (M) | <0.001⁎⁎⁎ | <0.001⁎⁎⁎ | <0.001⁎⁎⁎ |  | <0.001⁎⁎⁎ | <0.001⁎⁎⁎ | <0.001⁎⁎⁎ |
| R*M | <0.001⁎⁎⁎ | 0.070ⁿˢ | 0.004⁎⁎ |  | <0.001⁎⁎⁎ | 0.001⁎⁎ | 0.046⁎ |
| Three-way ANOVA (C*R*M) | Compost (C) | 0.311ⁿˢ |  |  |  | 0.309ⁿˢ |  |  |
| Compost*AMF | <0.001⁎⁎⁎ |  |  |  | <0.001⁎⁎⁎ |  |  |
| C*R | 0.009⁎⁎ |  |  |  | <0.001⁎⁎⁎ |  |  |
| C*R*M | <0.001⁎⁎⁎ |  |  |  | <0.001⁎⁎⁎ |  |  |

Table 3. Effect of several mycorrhizal species along with Compost and Rock Phosphate treatments on citrus seedling Zn, Fe, Mn and Cu concentration (mg DM kg-1)

| **Rock_P** | **AMF** | **Shoot Zn (ppm)** | | | **Shoot Fe (ppm)** | | |  | **Shoot Mn (ppm)** | |  | **Shoot Cu (ppm)** | |
| --- | --- | --- | --- | --- | --- | --- | --- | --- | --- | --- | --- | --- | --- |
| **C0** | **C20** | **C40** | **C0** | **C20** | **C40** | **C0** | **C20** | **C40** | **C0** | **C20** | **C40** | |
| R0 | M1 | 13.81 ± 0.90 | 22.40 ± 1.30 | 19.75 ± 2.67 | 70.25 ± 26.50 | 222.83 ± 13.06 | 124.54 ± 37.42 | 29.60 ± 7.90 | 111.53 ± 2.08 | 59.27 ± 22.86 | 6.43 ± 1.43 | 16.25 ± 0.35 | 12.15 ± 0.25 | |
| R0 | M2 | 30.30 ± 2.80 | 29.25 ± 2.45 | 26.40 ± 3.00 | 93.69 ± 36.00 | 196.76 ± 62.07 | 156.04 ± 9.65 | 55.00 ± 16.44 | 81.11 ± 29.58 | 84.87 ± 10.80 | 8.00 ± 1.40 | 14.73 ± 2.14 | 16.13 ± 3.96 | |
| R0 | M3 | 33.13 ± 3.23 | 24.53 ± 2.52 | 20.80 ± 0.80 | 91.31 ± 24.08 | 80.93 ± 40.51 | 71.80 ± 23.40 | 57.40 ± 2.56 | 44.53 ± 11.17 | 34.23 ± 10.68 | 14.17 ± 7.09 | 21.35 ± 0.65 | 16.72 ± 3.38 | |
| R0 | M4 | 23.55 ± 1.35 | 19.40 ± 1.50 | 31.50 ± 0.40 | 120.44 ± 84.05 | 71.36 ± 46.22 | 68.97 ± 40.01 | 70.57 ± 38.40 | 34.32 ± 10.43 | 35.57 ± 4.33 | 22.65 ± 0.25 | 14.40 ± 4.13 | 15.90 ± 1.90 | |
| R0 | M5 | 30.69 ± 3.48 | 26.27 ± 3.81 | 26.77 ± 2.42 | 53.09 ± 31.92 | 44.29 ± 31.43 | 41.40 ± 2.33 | 34.70 ± 4.95 | 32.87 ± 4.55 | 30.95 ± 1.15 | 8.28 ± 0.18 | 15.00 ± 0.90 | 20.10 ± 1.10 | |
| R0 | M6 | 20.10 ± 1.46 | 19.98 ± 3.23 | 26.03 ± 7.11 | 31.80 ± 7.32 | 49.40 ± 5.67 | 54.33 ± 2.91 | 23.40 ± 5.78 | 26.33 ± 1.42 | 54.71 ± 35.71 | 16.65 ± 2.15 | 20.20 ± 1.20 | 12.02 ± 3.12 | |
| R0 | M7 | 31.21 ± 13.00 | 29.63 ± 6.16 | 33.83 ± 3.62 | 32.10 ± 4.11 | 32.66 ± 14.04 | 34.59 ± 13.41 | 36.62 ± 1.25 | 32.87 ± 11.25 | 28.85 ± 0.25 | 15.04 ± 7.06 | 17.55 ± 0.55 | 15.05 ± 2.65 | |
| R2 | M1 | 26.61 ± 1.28 | 18.09 ± 2.07 | 15.88 ± 3.17 | 112.20 ± 10.24 | 95.02 ± 24.50 | 70.19 ± 41.10 | 51.90 ± 1.71 | 46.09 ± 23.31 | 28.95 ± 11.96 | 6.87 ± 1.10 | 13.80 ± 1.20 | 11.01 ± 1.31 | |
| R2 | M2 | 33.03 ± 3.55 | 26.25 ± 2.45 | 32.15 ± 4.04 | 84.85 ± 32.40 | 124.92 ± 59.92 | 102.61 ± 67.86 | 51.23 ± 5.84 | 55.33 ± 5.70 | 41.70 ± 6.10 | 8.27 ± 0.67 | 11.40 ± 4.81 | 13.50 ± 2.08 | |
| R2 | M3 | 27.95 ± 0.55 | 34.30 ± 0.60 | 27.40 ± 1.47 | 131.42 ± 34.12 | 94.87 ± 38.66 | 77.94 ± 39.41 | 64.15 ± 2.55 | 58.97 ± 24.39 | 52.80 ± 11.72 | 18.95 ± 0.95 | 18.65 ± 0.95 | 13.33 ± 4.85 | |
| R2 | M4 | 25.11 ± 2.79 | 28.87 ± 6.86 | 34.25 ± 4.65 | 40.76 ± 9.26 | 87.71 ± 37.40 | 57.39 ± 5.14 | 26.84 ± 2.91 | 41.52 ± 15.82 | 45.30 ± 0.70 | 15.63 ± 6.32 | 11.62 ± 0.62 | 9.85 ± 0.75 | |
| R2 | M5 | 25.65 ± 1.45 | 21.95 ± 7.65 | 19.85 ± 0.25 | 25.79 ± 16.29 | 46.88 ± 29.77 | 48.51 ± 27.88 | 34.37 ± 8.16 | 52.75 ± 33.40 | 40.73 ± 17.95 | 14.07 ± 5.44 | 8.12 ± 1.42 | 19.60 ± 1.30 | |
| R2 | M6 | 28.77 ± 1.41 | 25.64 ± 8.97 | 18.83 ± 1.37 | 51.12 ± 0.98 | 53.59 ± 11.37 | 59.72 ± 34.97 | 48.59 ± 23.75 | 26.75 ± 8.19 | 32.41 ± 9.71 | 15.23 ± 5.36 | 20.12 ± 4.70 | 5.31 ± 0.77 | |
| R2 | M7 | 36.80 ± 3.41 | 28.97 ± 3.30 | 23.60 ± 0.40 | 48.60 ± 5.46 | 63.06 ± 8.50 | 83.67 ± 0.34 | 38.13 ± 6.87 | 38.80 ± 2.50 | 51.10 ± 13.27 | 7.50 ± 1.78 | 15.77 ± 1.82 | 17.85 ± 0.15 | |
| R4 | M1 | 17.07 ± 0.90 | 16.97 ± 4.16 | 23.27 ± 1.38 | 118.64 ± 22.89 | 126.55 ± 51.98 | 51.95 ± 2.41 | 55.10 ± 10.54 | 48.16 ± 16.53 | 25.41 ± 1.41 | 8.98 ± 3.02 | 13.81 ± 4.66 | 12.49 ± 2.29 | |
| R4 | M2 | 29.70 ± 1.90 | 30.90 ± 3.90 | 34.25 ± 3.15 | 104.46 ± 34.00 | 132.32 ± 33.41 | 95.84 ± 43.51 | 57.97 ± 9.26 | 67.40 ± 12.04 | 52.92 ± 26.00 | 12.73 ± 0.55 | 17.60 ± 0.50 | 8.00 ± 0.20 | |
| R4 | M3 | 30.30 ± 6.65 | 27.87 ± 6.01 | 31.55 ± 4.15 | 98.54 ± 20.15 | 70.92 ± 31.11 | 69.75 ± 8.43 | 55.37 ± 14.37 | 49.03 ± 14.52 | 44.90 ± 9.90 | 19.07 ± 2.08 | 13.75 ± 5.35 | 9.98 ± 1.42 | |
| R4 | M4 | 31.53 ± 5.27 | 32.17 ± 2.33 | 23.79 ± 1.51 | 26.53 ± 0.45 | 62.85 ± 35.24 | 49.49 ± 12.07 | 34.90 ± 3.50 | 26.77 ± 7.06 | 32.30 ± 2.60 | 13.60 ± 2.00 | 10.74 ± 1.41 | 13.50 ± 6.07 | |
| R4 | M5 | 31.20 ± 6.70 | 29.05 ± 3.55 | 28.20 ± 3.90 | 27.30 ± 2.27 | 32.00 ± 1.14 | 38.75 ± 11.33 | 36.75 ± 4.25 | 35.85 ± 0.85 | 38.40 ± 17.10 | 17.70 ± 3.82 | 18.05 ± 0.55 | 15.27 ± 0.55 | |
| R4 | M6 | 26.84 ± 2.55 | 27.88 ± 4.36 | 15.92 ± 1.58 | 62.34 ± 39.80 | 24.52 ± 1.23 | 28.45 ± 8.07 | 30.88 ± 2.38 | 22.90 ± 3.30 | 24.09 ± 3.27 | 16.74 ± 3.40 | 14.64 ± 2.01 | 16.28 ± 2.05 | |
| R4 | M7 | 27.47 ± 5.66 | 28.00 ± 3.40 | 19.64 ± 0.04 | 51.30 ± 0.94 | 29.63 ± 16.29 | 24.70 ± 2.03 | 35.17 ± 6.83 | 29.53 ± 5.96 | 37.44 ± 2.24 | 8.00 ± 2.00 | 13.18 ± 2.50 | 19.04 ± 1.61 | |
| **Compost Mean** | | **27.66 ± 6.49 ᴬ** | **26.11 ± 5.89 ᴬᴮ** | **25.41 ± 6.37 ᴮ** | **70.31 ± 41.76 ᴮ** | **83.00 ± 58.96 ᴬ** | **67.17 ± 38.99 ᴮ** | **44.22 ± 16.51** | **45.88 ± 24.05** | **41.76 ± 18.03** | **13.07 ± 5.52 ᴮ** | **15.27 ± 3.95 ᴬ** | **13.96 ± 4.32 ᴮ** | |
| AMF Mean | M1 | 19.16 ± 5.83 ᶜ | 19.15 ± 3.46 ᵇ | 19.63 ± 3.88 ᵈ | 100.37 ± 29.16 ᵃᵇ | 148.13 ± 64.75 ᵃ | 82.23 ± 42.93 ᵃᵇ | 45.53 ± 13.74 ᵃᵇ | 68.59 ± 35.26 ᵃ | 37.88 ± 20.66 ᵇ | 7.43 ± 2.12 ᶜ | 14.62 ± 2.71 ᵃᵇ | 11.88 ± 1.48 ᵇ | |
| M2 | 31.01 ± 2.90 ᵃᵇ | 28.80 ± 3.31 ᵃ | 30.93 ± 4.60 ᵃ | 94.33 ± 30.79 ᵃᵇ | 151.34 ± 57.54 ᵃ | 118.16 ± 49.64 ᵃ | 54.73 ± 10.30 ᵃ | 67.95 ± 19.69 ᵃ | 59.83 ± 24.16 ᵃ | 9.67 ± 2.44 ᵇᶜ | 14.58 ± 3.77 ᵃᵇ | 12.54 ± 4.23 ᵇ | |
| M3 | 30.46 ± 4.33 ᵃᵇ | 28.90 ± 5.40 ᵃ | 26.58 ± 5.20 ᵃᵇᶜ | 107.09 ± 29.67 ᵃ | 82.24 ± 33.68 ᵇ | 73.16 ± 23.59 ᵇ | 58.97 ± 8.41 ᵃ | 50.84 ± 16.54 ᵃᵇ | 43.98 ± 12.35 ᵃᵇ | 17.39 ± 4.44 ᵃ | 17.92 ± 4.32 ᵃ | 13.35 ± 4.21 ᵇ | |
| M4 | 26.73 ± 4.77 ᵃᵇ | 26.81 ± 6.83 ᵃ | 29.84 ± 5.30 ᵃᵇ | 62.57 ± 60.90 ᵇᶜ | 73.97 ± 36.25 ᵇ | 58.62 ± 22.70 ᵇ | 44.10 ± 27.93 ᵃᵇ | 34.20 ± 11.96 ᵇᶜ | 37.72 ± 6.39 ᵇ | 17.29 ± 5.28 ᵃ | 12.25 ± 2.76 ᵇ | 13.08 ± 4.15 ᵇ | |
| M5 | 29.18 ± 4.67 ᵃᵇ | 25.76 ± 5.57 ᵃ | 24.94 ± 4.50 ᶜ | 35.39 ± 22.34 ᶜ | 41.05 ± 22.72 ᵇ | 42.88 ± 15.71 ᵇ | 35.27 ± 5.34 ᵇ | 40.49 ± 19.25 ᵇᶜ | 36.69 ± 13.17 ᵇ | 13.35 ± 5.29 ᵃᵇ | 13.72 ± 4.49 ᵇ | 18.32 ± 2.47 ᵃ | |
| M6 | 25.23 ± 4.26 ᵇᶜ | 24.50 ± 6.32 ᵃᵇ | 20.26 ± 5.83 ᵈ | 48.42 ± 24.26 ᶜ | 42.50 ± 15.03 ᵇ | 47.50 ± 23.10 ᵇ | 34.29 ± 16.62 ᵇ | 25.32 ± 4.83 ᶜ | 37.07 ± 23.09 ᵇ | 16.20 ± 3.43 ᵃ | 18.32 ± 3.81 ᵃ | 11.20 ± 5.16 ᵇ | |
| M7 | 31.82 ± 8.35 ᵃ | 28.87 ± 3.95 ᵃ | 25.69 ± 6.60 ᵇᶜ | 44.00 ± 9.64 ᶜ | 41.79 ± 19.75 ᵇ | 47.65 ± 28.18 ᵇ | 36.64 ± 5.05 ᵇ | 33.73 ± 7.66 ᵇᶜ | 39.13 ± 11.82 ᵇ | 10.18 ± 5.25 ᵇᶜ | 15.50 ± 2.47 ᵃᵇ | 17.31 ± 2.36 ᵃ | |
| Rock_P man | R0 | 26.11 ± 8.16 | 24.50 ± 4.83 | 26.44 ± 5.67 | 70.38 ± 45.65 | 99.75 ± 79.22 ᵃ | 78.81 ± 46.98 ᵃ | 43.90 ± 21.31 | 51.94 ± 32.39 ᵃ | 46.92 ± 24.16 | 13.03 ± 6.42 | 17.07 ± 3.06 ᵃ | 15.44 ± 3.45 ᵃ | |
| R2 | 29.13 ± 4.51 | 26.30 ± 6.74 | 24.57 ± 6.99 | 70.68 ± 40.98 | 80.86 ± 38.82 ᵃᵇ | 71.43 ± 35.93 ᵃᵇ | 45.03 ± 14.71 | 45.74 ± 19.30 ᵃᵇ | 41.86 ± 12.73 | 12.36 ± 5.54 | 14.21 ± 4.66 ᵇ | 12.92 ± 4.93 ᵇ | |
| R4 | 27.73 ± 6.22 | 27.55 ± 5.81 | 25.23 ± 6.56 | 69.87 ± 40.51 | 68.40 ± 49.68 ᵇ | 51.28 ± 28.08 ᵇ | 43.73 ± 13.17 | 39.95 ± 17.22 ᵇ | 36.49 ± 14.32 | 13.83 ± 4.61 | 14.54 ± 3.49 ᵇ | 13.51 ± 4.23 ᵇ | |
| Two-way ANOVA (R*M) | Rock_P (R) | 0.094ⁿˢ | 0.088ⁿˢ | 0.133ⁿˢ | 0.996ⁿˢ | 0.015⁎ | 0.007⁎⁎ | 0.931ⁿˢ | 0.041⁎ | 0.063ⁿˢ | 0.406ⁿˢ | 0.001⁎⁎ | 0.006⁎⁎ | |
| AMF (M) | <0.001⁎⁎⁎ | <0.001⁎⁎⁎ | <0.001⁎⁎⁎ | <0.001⁎⁎⁎ | <0.001⁎⁎⁎ | <0.001⁎⁎⁎ | <0.001⁎⁎⁎ | <0.001⁎⁎⁎ | 0.010⁎ | <0.001⁎⁎⁎ | <0.001⁎⁎⁎ | <0.001⁎⁎⁎ | |
| R*M | 0.006⁎⁎ | 0.014⁎ | <0.001⁎⁎⁎ | 0.009⁎⁎ | 0.022⁎ | 0.116ⁿˢ | 0.003⁎⁎ | 0.001⁎⁎ | 0.003⁎⁎ | 0.003⁎⁎ | <0.001⁎⁎⁎ | <0.001⁎⁎⁎ | |
| Three-way ANOVA (C*R*M) | Compost (C) | 0.006⁎⁎ |  |  | 0.009⁎⁎ |  |  | 0.238ⁿˢ |  |  | <0.001⁎⁎⁎ |  |  | |
| Compost*AMF | 0.029⁎ |  |  | <0.001⁎⁎⁎ |  |  | <0.001⁎⁎⁎ |  |  | <0.001⁎⁎⁎ |  |  | |
| C*R | 0.024⁎ |  |  | 0.127ⁿˢ |  |  | 0.322ⁿˢ |  |  | 0.095ⁿˢ |  |  | |
| C*R*M | <0.001⁎⁎⁎ |  |  | 0.005⁎⁎ |  |  | <0.001⁎⁎⁎ |  |  | <0.001⁎⁎⁎ |  |  | |

Table 4. Effect of several mycorrhizal species and compost and RP treatments on citrus seedling MD

| **Treatments** | | **Mycorrhizae Species** | | | | | |
| --- | --- | --- | --- | --- | --- | --- | --- |
| Compost(g/kg) | RP(g/kg) | ***G. mosseae*** | ***G. caledonium*** | ***G. etincatunium*** | ***G. clarium*** | ***Indigenous*** | ***Cocktail*** | |
| 0 | 0 | 91 | 81 | 63 | 55 | 39 | 93 | |
| 2 | 92 | 88 | 81 | 92 | 50 | 90 | |
| 4 | 90 | 87 | 88 | 85 | 54 | 79 | |
| **Mean** | **91** | **85** | **77** | **77** | **47** | **87** | |
| 20 | 0 | 83 | 72 | 65 | 79 | 20 | 75 | |
| 2 | 82 | 59 | 59 | 65 | 43 | 80 | |
| 4 | 93 | 75 | 76 | 81 | 71 | 87 | |
| **Mean** | **86** | **69** | **67** | **75** | **45** | **81** | |
| 40 | 0 | 88 | 21 | 85 | 43 | 42 | 85 | |
| 2 | 87 | 88 | 87 | 82 | 50 | 82 | |
| 4 | 87 | 89 | 92 | 86 | 62 | 85 | |
| **Mean** | **87** | **83** | **85** | **81** | **53** | **84** | |
| **General Mean** | | **88** | **73** | **77** | **74** | **48** | **84** | |


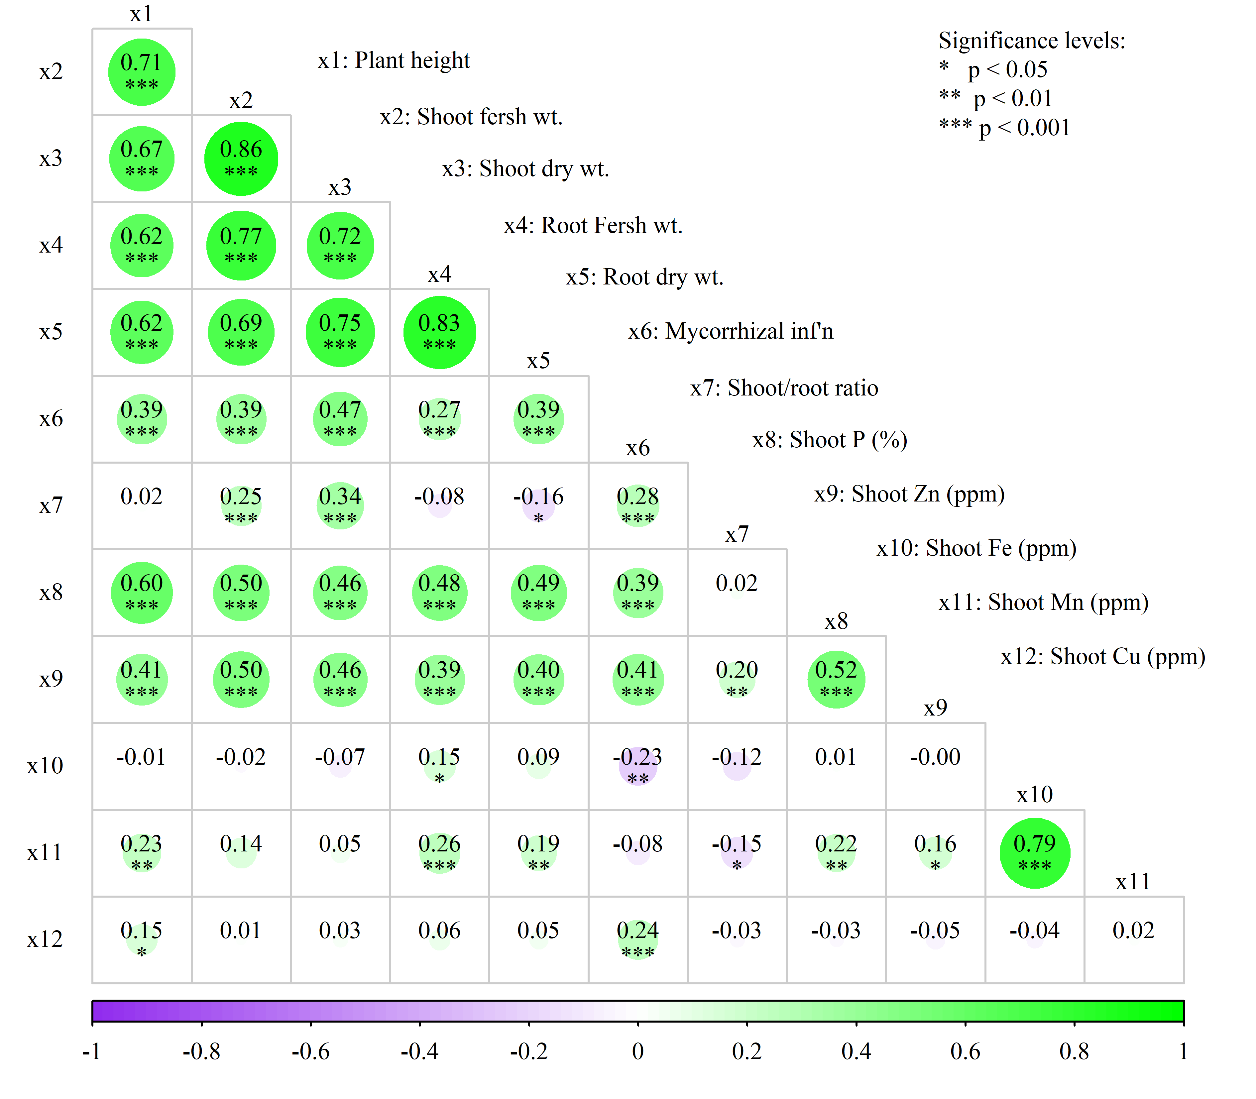


Table 5. Pearson correlation table
